# Supplementary material for: Characterization of Depressive Symptom Trajectories in Women between Childbirth and Diagnosis
Source: MDPI journal article supplement (doi:10.3390/jpm12040538), 2022-03-28
Supplement: s1 [file s1]

## Supplementary Materials

**Table S1.** Missing variables, with more than 1% of missing values.

| Variable                                         | Count (%) |
|--------------------------------------------------|-----------|
| Support at home                                  | 17        |
| PMS value                                        | 11        |
| PMS Severity                                     | 9         |
| Complication during pregnancy                    | 5         |
| Income                                           | 4         |
| Complications during birth                       | 3         |
| Highest degree of education                      | 3         |
| Completed professional education                 | 1         |
| RLS                                              | 1         |
| Birth-related psychological and physical traumas | 1         |
| RLS Value                                        | 1         |
| Marital status                                   | 1         |
| Stressful life events: Family                    | 1         |
| Family status                                    | 1         |
| Stressful life events: Personal                  | 1         |
| Stressful life events                            | 1         |
| Total amount of children                         | 1         |

Abbreviations: PMS, premenstrual syndrome; EPDS, Edinburgh Postnatal Depression Scale; MPAS, Maternal Postnatal Attachment Scale; SLE, stressful life events.

**Table S2.** Normality of EPDS values distributions.

| EPDS    | Cluster 1 | Cluster 2 | Cluster 3 | Cluster 4 | Cluster 5 | Cluster 6 |
|---------|-----------|-----------|-----------|-----------|-----------|-----------|
| EPDS T0 | --        | --        | --        | +         | --        | --        |
| EPDS T1 | +         | +         | --        | +         | --        | --        |
| EPDS T2 | --        | --        | --        | --        | --        | +         |
| EPDS T3 | --        | +         | --        | +         | --        | +         |
| EPDS T4 | --        | +         | --        | +         | --        | --        |

Abbreviation: EPDS, Edinburgh Postnatal Depression Scale.+, normal distribution; --,not normal distribution.

**Table S3.** Significant differences of demographic features across patient groups.

| Risk Factors                                     | Values                      | Diagnosis  |            |           | p-Value |
|--------------------------------------------------|-----------------------------|------------|------------|-----------|---------|
|                                                  |                             | HC         | PPD        | AD        |         |
| Income                                           | Less than 20,000/year       | 49 (9.9)   | 13 (16.4)  | 2 (1.1)   | <0.001  |
|                                                  | 20,000–50,000/year          | 140 (30.9) | 18 (32.7)  | 42 (46.7) |         |
|                                                  | More than 50,000/year       | 264 (58.3) | 24 (43.6)  | 46 (51.1) |         |
| Familial psychiatric history                     | None                        | 350 (77.3) | 35 (63.6)  | 52 (57.8) | <0.001  |
|                                                  | Yes                         | 103 (22.7) | 20 (36.4)  | 38 (42.2) |         |
| PMS value                                        | Mean (SD)                   | 6.5 (6.4)  | 12.0 (8.0) | 9.3 (6.8) | <0.001  |
| Psychiatric diagnosis in previous pregnancy      | None, no previous pregnancy | 243 (53.6) | 25 (45.5)  | 52 (57.8) | <0.001  |
|                                                  | Yes                         | 10 (2.2)   | 9 (16.4)   | 6 (6.7)   |         |
|                                                  | None, previous pregnancy    | 200 (44.2) | 21 (38.2)  | 32 (35.6) |         |
| Stressful life events                            | Mean (SD)                   | 0.9 (1.3)  | 1.7 (1.8)  | 1.5 (1.6) | <0.001  |
| Previous depression                              | None                        | 418 (92.3) | 33 (60.0)  | 64 (71.1) | <0.001  |
|                                                  | Yes                         | 35 (7.7)   | 22 (40.0)  | 26 (28.9) |         |
| Baby blues                                       | None                        | 289 (63.8) | 14 (25.5)  | 20 (22.2) | <0.001  |
|                                                  | Yes                         | 164 (36.2) | 41 (74.5)  | 70 (77.8) |         |
| Birth related psychological and physical traumas | None                        | 410 (90.5) | 43 (78.2)  | 62 (68.9) | <0.001  |
|                                                  | Yes                         | 43 (9.5)   | 12 (21.8)  | 28 (31.1) |         |

Abbreviations: HC, healthy controls; PPD, postpartum depression; AD, adjustment disorder; SD, standard deviation PMS, premenstrual syndrome; EPDS, Edinburgh Postnatal Depression Scale; MPAS, Maternal Postnatal Attachment Scale; SLE, stressful life events.

**Table S4.** Differences of features between HCs and AD patients, and between HCs and PPD patients.

| Risk Factors                                     | Values    | Diagnosis  |            | p-Value |
|--------------------------------------------------|-----------|------------|------------|---------|
|                                                  |           | HC         | AD         |         |
| Complications during birth                       | None      | 333 (73.5) | 50 (55.6)  | 0.001   |
|                                                  | Yes       | 120 (26.5) | 40 (44.4)  |         |
| EPDS T0                                          | Mean (SD) | 4.3 (3.1)  | 9.6 (4.7)  | <0.001  |
| EPDS T1                                          | Mean (SD) | 4.5 (2.9)  | 10.4 (3.5) | <0.001  |
| EPDS T2                                          | Mean (SD) | 3.3 (2.6)  | 7.9 (3.9)  | <0.001  |
| EPDS T3                                          | Mean (SD) | 2.9 (2.7)  | 5.8 (3.3)  | <0.001  |
| EPDS T4                                          | Mean (SD) | 2.5 (2.3)  | 5.3 (3.0)  | <0.001  |
| Familial psychiatric history                     | None      | 352 (77.7) | 52 (57.8)  | <0.001  |
|                                                  | Yes       | 101 (22.3) | 38 (42.2)  |         |
| MPAS T1                                          | Mean (SD) | 85.9 (5.1) | 81.2 (7.3) | <0.001  |
| MPAS T2                                          | Mean (SD) | 86.1 (5.2) | 82.9 (5.9) | <0.001  |
| MPAS T3                                          | Mean (SD) | 86.5 (5.1) | 84.1 (5.6) | <0.001  |
| MPAS T4                                          | Mean (SD) | 86.9 (4.8) | 84.8 (5.7) | <0.001  |
| PMS Severity                                     | None      | 237 (52.3) | 27 (30.0)  | <0.001  |
|                                                  | Moderate  | 163 (36.0) | 40 (44.4)  |         |
|                                                  | Severe    | 53 (11.7)  | 23 (25.6)  |         |
| Stressful life events                            | Mean (SD) | 0.9 (1.3)  | 1.5 (1.6)  | <0.001  |
| Support at home                                  | Mean (SD) | 1.8 (0.9)  | 2.3 (1.1)  | <0.001  |
| Baby blues                                       | None      | 290 (64.0) | 20 (22.2)  | <0.001  |
|                                                  | Yes       | 163 (36.0) | 70 (77.8)  |         |
| Birth related psychological and physical traumas | None      | 412 (90.9) | 62 (68.9)  | <0.001  |
|                                                  | Yes       | 41 (9.1)   | 28 (31.1)  |         |
| Previous depression                              | None      | 419 (92.5) | 64 (71.1)  | <0.001  |
|                                                  | Yes       | 34 (7.5)   | 26 (28.9)  |         |
|                                                  |           | Diagnosis  |            |         |
|                                                  |           | HC         | PPD        |         |
| EPDS T0                                          | Mean (SD) | 4.3 (3.1)  | 8.5 (4.3)  | <0.001  |
| EPDS T1                                          | Mean (SD) | 4.5 (2.9)  | 12.0 (5.7) | <0.001  |

|                                             |                             |            |            |        |
|---------------------------------------------|-----------------------------|------------|------------|--------|
| EPDS T2                                     | Mean (SD)                   | 3.3 (2.6)  | 12.5 (4.4) | <0.001 |
| EPDS T3                                     | Mean (SD)                   | 2.9 (2.7)  | 12.4 (4.9) | <0.001 |
| EPDS T4                                     | Mean (SD)                   | 2.5 (2.3)  | 13.0 (4.0) | <0.001 |
| Family status                               | Single                      | 6 (1.3)    | 6 (10.9)   | <0.001 |
|                                             | With partner                | 447 (98.7) | 49 (89.1)  |        |
| Income                                      | Less than 20000/year        | 46 (10.2)  | 14 (25.5)  | <0.001 |
|                                             | 20000–50000/year            | 139 (30.7) | 18 (32.7)  |        |
|                                             | More than 50000/year        | 268 (59.2) | 23 (41.8)  |        |
| MPAS T1                                     | Mean (SD)                   | 85.9 (5.1) | 80.9 (7.3) | <0.001 |
| MPAS T2                                     | Mean (SD)                   | 86.1 (5.2) | 78.6 (8.5) | <0.001 |
| MPAS T3                                     | Mean (SD)                   | 86.5 (5.1) | 79.0 (8.2) | <0.001 |
| MPAS T4                                     | Mean (SD)                   | 86.9 (4.8) | 79.5 (7.2) | <0.001 |
| PMS Severity                                | None                        | 237 (52.3) | 12 (21.8)  | <0.001 |
|                                             | Moderate                    | 163 (36.0) | 18 (32.7)  |        |
|                                             | Severe                      | 53 (11.7)  | 25 (45.5)  |        |
| Psychiatric diagnosis in previous pregnancy | None, no previous pregnancy | 243 (53.6) | 26 (47.3)  | <0.001 |
|                                             | Yes                         | 10 (2.2)   | 9 (16.4)   |        |
|                                             | None, previous pregnancy    | 200 (44.2) | 20 (36.4)  |        |
| Stressful life events                       | Mean (SD)                   | 0.9 (1.3)  | 1.7 (1.8)  | <0.001 |
| Support at home                             | Mean (SD)                   | 1.8 (0.9)  | 2.7 (1.5)  | <0.001 |
| Baby blues                                  | None                        | 290 (64.0) | 13 (23.6)  | <0.001 |
|                                             | Yes                         | 163 (36.0) | 42 (76.4)  |        |
| Previous depression                         | None                        | 419 (92.5) | 32 (58.2)  | <0.001 |
|                                             | Yes                         | 34 (7.5)   | 23 (41.8)  |        |

Abbreviations: HC, healthy controls; PPD, postpartum depression; AD, adjustment disorder; SD, standard deviation PMS, premenstrual syndrome; EPDS, Edinburgh Postnatal Depression Scale; MPAS, Maternal Postnatal Attachment Scale; SLE, stressful life events.

**Table S5.** Differences of immediately after birth features across patient groups.

| Risk Factors | Values    | PPD        | AD         | p-Value |
|--------------|-----------|------------|------------|---------|
| Baby blues   | None      | 14 (25.5)  | 20 (22.2)  | <0.001  |
|              | Yes       | 41 (74.5)  | 70 (77.8)  |         |
| EPDS T0      | Mean (SD) | 8.5 (4.3)  | 9.6 (4.7)  | 0.161   |
| EPDS T1      | Mean (SD) | 12.0 (5.7) | 10.4 (3.5) | 0.044   |
| EPDS T2      | Mean (SD) | 12.5 (4.4) | 7.9 (3.9)  | <0.001  |
| EPDS T3      | Mean (SD) | 12.4 (4.9) | 5.8 (3.3)  | <0.001  |
| EPDS T4      | Mean (SD) | 13.0 (4.0) | 5.3 (3.0)  | <0.001  |
| Income       | 2         | 14 (25.5)  | 2 (2.2)    | <0.001  |
|              | 3         | 18 (32.7)  | 42 (46.7)  |         |
|              | 4         | 23 (41.8)  | 46 (51.1)  |         |
| MPAS T1      | Mean (SD) | 80.9 (7.3) | 81.2 (7.3) | 0.833   |
| MPAS T2      | Mean (SD) | 78.6 (8.5) | 82.9 (5.9) | <0.001  |
| MPAS T3      | Mean (SD) | 79.0 (8.2) | 84.1 (5.6) | <0.001  |
| MPAS T4      | Mean (SD) | 79.5 (7.2) | 84.8 (5.7) | <0.001  |

Abbreviations: HC, healthy controls; PPD, postpartum depression; AD, adjustment disorder; SD, standard deviation PMS, premenstrual syndrome; EPDS, Edinburgh Postnatal Depression Scale; MPAS, Maternal Postnatal Attachment Scale; SLE, stressful life events.

## LCMM EPDS: Model Selection

Table S6. Best four models for LCMM of EPDS scores plus appropriate varying starting conditions.

| Model Name                       | Nr<br>Classes | AIC   | BIC   | SABIC | Entropy | LMR LRT                                                                    | %class1 | %class2 | %class3 | %class4 | %class5 | %class6 |
|----------------------------------|---------------|-------|-------|-------|---------|----------------------------------------------------------------------------|---------|---------|---------|---------|---------|---------|
| mQFQMQR4<br>tf_nr                | 4             | 15002 | 15112 | 15033 | 0.70    | Vs<br>mQFQMQR3tf_<br>nr $p < 0.001$ vs<br>mQFQMQR5tf_<br>nr $p = 1.000$    | 29.8    | 28.3    | 35.4    | 6.5     | --      | --      |
| mQFQMQR4<br>tf_nr_gridsea<br>rch | 4             | 15002 | 15112 | 15033 | 0.70    |                                                                            | 35.4    | 28.3    | 29.8    | 6.5     | --      | --      |
| mQFQR5tf_n<br>r                  | 5             | 15015 | 15112 | 15042 | 0.76    | Vs<br>mQFQR4tf_nr $p$<br>= 0.049 vs<br>mQFQR6tf_nr $p$<br>= 1.000          | 3.5     | 24.1    | 28.1    | 34.8    | 9.5     | --      |
| mQFQR5tf_n<br>r_gridsearch       | 5             | 15015 | 15112 | 15042 | 0.76    |                                                                            | 24.0    | 28.1    | 34.8    | 3.6     | 9.5     | --      |
| mQFQMLR5t<br>f_nr                | 5             | 15022 | 15141 | 15055 | 0.73    | Vs<br>mQFQMLR4tf_<br>nr $p < 0.001$ vs<br>mQFQMLR6tf_<br>nr<br>$p = 1.000$ | 17.6    | 8.7     | 34.6    | 36.0    | 3.2     | --      |
| mQFQMLR5t<br>f_nr_gridsear<br>ch | 5             | 15022 | 15141 | 15055 | 0.73    |                                                                            | 8.7     | 3.2     | 34.6    | 35.9    | 17.6    | --      |
| mQFQM6ff_<br>nr                  | 6             | 15083 | 15192 | 15113 | 0.82    | Vs<br>mQFQM5ff_nr<br>$p < 0.001$ vs<br>mQFQM7ff_nr<br>$p = 1.000$          | 9.5     | 2.8     | 5.2     | 7.6     | 71.5    | 3.3     |
| mQFQM6ff_<br>nr_gridsearc<br>h   | 6             | 15083 | 15192 | 15113 | 0.82    |                                                                            | 7.6     | 5.2     | 9.6     | 71.6    | 3.3     | 2.8     |

The trajectories of the calculated models are provided in Figure S1. Based on information criteria, entropy and trajectory shapes, we focus on the two models: the five-class model solution with quadratic dependence of fixed and mixed effects, and linear dependence of random effects (mQFQMLR5tf\_nr); and the six-class model solution with quadratic dependence of fixed and mixed effects, and constant dependence of random effects (mQFQM6ff\_nr). Although AIC, BIC and SABIC results are lower in four-class solution mQFQMLR5tf\_nr and mQFQM6ff\_nr possess higher entropy. Upon closer inspection, the similarities between the shapes of trajectories are obvious. However, the five cluster solution differ only in magnitude, and we expect difference in the shape due to different diagnoses. Abbreviations: AIC, the Akaike information criterion; BIC, Bayesian information criterion; SABIC, the sample-adjusted Bayesian information criterion; LMR LRT, the Lo–Mendell–Rubin likelihood test. --, not normal distribution.

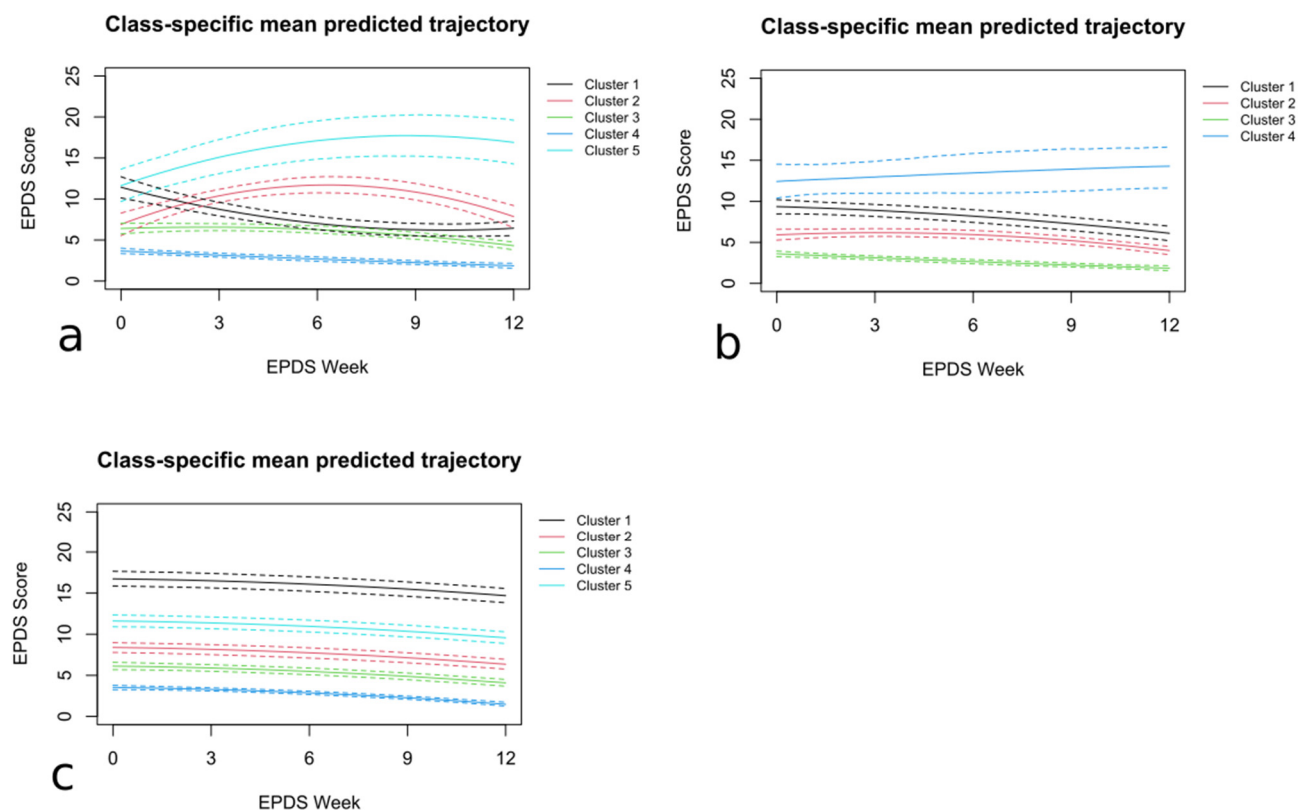

**Figure S1.** Plots of EPDS clusters for models from the table S6: (a) mQFQMQR4tf\_nr, (b) mQFQR5tf\_nr, (c) mQFQMLR5tf\_nr. EPDS, Edinburgh Postnatal Depression Scale.

### Results LCMM EPDS: Clusters

**Table S7.** Total association between prenatal features in EPDS clusters.

| Risk Factors                 | Values                | Clusters   |            |            |            |            |            | p-Value |
|------------------------------|-----------------------|------------|------------|------------|------------|------------|------------|---------|
|                              |                       | 1          | 2          | 3          | 4          | 5          | 6          |         |
| EPDS T0                      | Mean (SD)             | 10.5 (2.2) | 10.8 (3.1) | 14.4 (3.7) | 7.0 (2.8)  | 3.9 (2.7)  | 3.3 (2.2)  | <0.001  |
| EPDS T1                      | Mean (SD)             | 10.2 (3.4) | 16.4 (6.3) | 8.9 (3.6)  | 9.5 (3.4)  | 4.3 (2.9)  | 10.9 (3.6) | <0.001  |
| EPDS T2                      | Mean (SD)             | 8.1 (2.5)  | 16.8 (3.2) | 5.1 (4.4)  | 10.2 (2.7) | 3.0 (2.4)  | 11.6 (2.6) | <0.001  |
| EPDS T3                      | Mean (SD)             | 6.3 (2.7)  | 17.5 (2.9) | 3.7 (3.1)  | 10.4 (2.8) | 2.6 (2.4)  | 8.6 (3.0)  | <0.001  |
| EPDS T4                      | Mean (SD)             | 5.3 (2.5)  | 17.6 (2.7) | 3.6 (3.2)  | 10.3 (2.6) | 2.4 (2.4)  | 4.6 (2.6)  | <0.001  |
| Familial psychiatric history | None                  | 32 (56.1)  | 8 (47.1)   | 19 (61.3)  | 26 (57.8)  | 336 (78.5) | 17 (85.0)  | <0.001  |
|                              | Yes                   | 25 (43.9)  | 9 (52.9)   | 12 (38.7)  | 19 (42.2)  | 92 (21.5)  | 3 (15.0)   |         |
| Family status                | Single parent         | 0 (0.0)    | 4 (23.5)   | 1 (3.2)    | 3 (6.7)    | 6 (1.4)    | 0 (0.0)    | <0.001  |
|                              | With partner          | 57 (100.0) | 13 (76.5)  | 30 (96.8)  | 42 (93.3)  | 422 (98.6) | 20 (100.0) |         |
| Income                       | Less than 20,000/year | 0 (0.0)    | 5 (29.4)   | 1 (3.2)    | 0 (0.0)    | 3 (0.7)    | 0 (0.0)    | <0.001  |
|                              | 20,000–50,000/year    | 2 (3.5)    | 4 (23.5)   | 1 (3.2)    | 4 (8.9)    | 40 (9.3)   | 2 (10.0)   |         |
|                              | More than 50,000/year | 26 (45.6)  | 4 (23.5)   | 18 (58.1)  | 15 (33.3)  | 129 (30.1) | 7 (35.0)   |         |
| MPAS T1                      | Mean (SD)             | 81.2 (7.2) | 80.1 (8.4) | 84.9 (6.3) | 81.4 (7.0) | 85.9 (5.1) | 81.2 (7.5) | <0.001  |
| MPAS T2                      | Mean (SD)             | 82.8 (6.0) | 76.6 (8.8) | 86.4 (4.4) | 80.1 (8.0) | 86.1 (5.2) | 82.2 (6.3) | <0.001  |
| MPAS T3                      | Mean (SD)             | 83.7 (5.8) | 74.7 (9.0) | 87.8 (3.6) | 81.6 (6.7) | 86.5 (5.1) | 83.3 (7.5) | <0.001  |
| MPAS T4                      | Mean (SD)             | 84.6 (6.0) | 77.8 (8.5) | 87.7 (3.9) | 81.3 (6.3) | 86.8 (5.0) | 84.8 (4.9) | <0.001  |
| PMS Severity                 | None                  | 19 (33.3)  | 1 (5.9)    | 11 (35.5)  | 11 (24.4)  | 229 (53.5) | 5 (25.0)   | <0.001  |
|                              | Moderate              | 23 (40.4)  | 7 (41.2)   | 16 (51.6)  | 15 (33.3)  | 153 (35.7) | 7 (35.0)   |         |

|                                                  |                             |           |            |           |           |            |           |        |
|--------------------------------------------------|-----------------------------|-----------|------------|-----------|-----------|------------|-----------|--------|
|                                                  | Severe                      | 15 (26.3) | 9 (52.9)   | 4 (12.9)  | 19 (42.2) | 46 (10.7)  | 8 (40.0)  |        |
|                                                  | None, no previous pregnancy | 30 (52.6) | 5 (29.4)   | 22 (71.0) | 26 (57.8) | 226 (52.8) | 12 (60.0) |        |
|                                                  | Yes                         | 7 (12.3)  | 8 (47.1)   | 2 (6.5)   | 1 (2.2)   | 6 (1.4)    | 1 (5.0)   | <0.001 |
|                                                  | None, previous pregnancy    | 20 (35.1) | 4 (23.5)   | 7 (22.6)  | 18 (40.0) | 196 (45.8) | 7 (35.0)  |        |
| Relocation to the other ward                     | None                        | 29 (50.9) | 13 (76.5)  | 17 (54.8) | 34 (75.6) | 327 (76.4) | 16 (80.0) |        |
|                                                  | Yes                         | 28 (49.1) | 4 (23.5)   | 14 (45.2) | 11 (24.4) | 101 (23.6) | 4 (20.0)  | <0.001 |
|                                                  | 0                           | 16 (28.1) | 2 (11.8)   | 9 (29.0)  | 20 (44.4) | 239 (55.8) | 14 (70.0) |        |
|                                                  | 1                           | 23 (40.4) | 4 (23.5)   | 8 (25.8)  | 5 (11.1)  | 98 (22.9)  | 3 (15.0)  |        |
|                                                  | 2                           | 8 (14.0)  | 5 (29.4)   | 4 (12.9)  | 8 (17.8)  | 45 (10.5)  | 2 (10.0)  |        |
|                                                  | 3                           | 7 (12.3)  | 3 (17.6)   | 4 (12.9)  | 7 (15.6)  | 24 (5.6)   | 1 (5.0)   |        |
| Stressful life events                            | 4                           | 3 (5.3)   | 0 (0.0)    | 3 (9.7)   | 1 (2.2)   | 12 (2.8)   | 0 (0.0)   |        |
| Support at home                                  | 5                           | 0 (0.0)   | 2 (11.8)   | 1 (3.2)   | 2 (4.4)   | 3 (0.7)    | 0 (0.0)   | <0.001 |
|                                                  | 6                           | 0 (0.0)   | 1 (5.9)    | 2 (6.5)   | 0 (0.0)   | 5 (1.2)    | 0 (0.0)   |        |
|                                                  | 7                           | 0 (0.0)   | 0 (0.0)    | 0 (0.0)   | 1 (2.2)   | 1 (0.2)    | 0 (0.0)   |        |
|                                                  | 8                           | 0 (0.0)   | 0 (0.0)    | 0 (0.0)   | 1 (2.2)   | 0 (0.0)    | 0 (0.0)   |        |
|                                                  | 9                           | 0 (0.0)   | 0 (0.0)    | 0 (0.0)   | 0 (0.0)   | 1 (0.2)    | 0 (0.0)   |        |
|                                                  | 1                           | 21 (36.8) | 2 (11.8)   | 16 (51.6) | 8 (17.8)  | 184 (43)   | 8 (40.0)  |        |
|                                                  | 2                           | 14 (24.6) | 6 (35.3)   | 4 (12.9)  | 19 (42.2) | 173 (40.4) | 7 (35.0)  |        |
| Support at home                                  | 3                           | 18 (31.6) | 2 (11.8)   | 6 (19.4)  | 8 (17.8)  | 54 (12.6)  | 2 (10.0)  |        |
|                                                  | 4                           | 3 (5.3)   | 3 (17.6)   | 4 (12.9)  | 6 (13.3)  | 12 (2.8)   | 2 (10.0)  | <0.001 |
|                                                  | 5                           | 1 (1.8)   | 3 (17.6)   | 1 (3.2)   | 3 (6.7)   | 4 (0.9)    | 1 (5.0)   |        |
|                                                  | 6                           | 0 (0.0)   | 1 (5.9)    | 0 (0.0)   | 1 (2.2)   | 1 (0.2)    | 0 (0.0)   |        |
| Baby blues                                       | None                        | 17 (29.8) | 3 (17.6)   | 11 (35.5) | 12 (26.7) | 277 (64.7) | 3 (15.0)  |        |
|                                                  | Yes                         | 40 (70.2) | 14 (82.4)  | 20 (64.5) | 33 (73.3) | 151 (35.3) | 17 (85.0) | <0.001 |
| Birth related psychological and physical traumas | None                        | 40 (70.2) | 15 (88.2)  | 24 (77.4) | 36 (80.0) | 390 (91.1) | 12 (60.0) |        |
|                                                  | Yes                         | 17 (29.8) | 2 (11.8)   | 7 (22.6)  | 9 (20.0)  | 38 (8.9)   | 8 (40.0)  | <0.001 |
| Previous depression                              | None                        | 40 (70.2) | 10 (58.8)  | 21 (67.7) | 28 (62.2) | 400 (93.5) | 16 (80.0) |        |
|                                                  | Yes                         | 17 (29.8) | 7 (41.2)   | 10 (32.3) | 17 (37.8) | 28 (6.5)   | 4 (20.0)  | <0.001 |
| Target                                           | HC                          | 17 (29.8) | 0 (0.0)    | 9 (29.0)  | 7 (15.6)  | 416 (97.2) | 4 (20.0)  |        |
|                                                  | PPD                         | 2 (3.5)   | 17 (100.0) | 1 (3.2)   | 29 (64.4) | 3 (0.7)    | 3 (15.0)  | <0.001 |
|                                                  | AD                          | 38 (66.7) | 0 (0.0)    | 21 (67.7) | 9 (20.0)  | 9 (2.1)    | 13 (65.0) |        |

Abbreviations: HC, healthy controls; PPD, postpartum depression; AD, adjustment disorder; SD, standard deviation PMS, premenstrual syndrome; EPDS, Edinburgh Postnatal Depression Scale; MPAS, Maternal Postnatal Attachment Scale; SLE, stressful life events.

**Table S8.** Significant differences between clusters 1 vs 5.

| Risk Factors                                | Values                      | Clusters   |            | p-Value |
|---------------------------------------------|-----------------------------|------------|------------|---------|
|                                             |                             | 1          | 5          |         |
| Familial psychiatric history                | None                        | 32 (56.1)  | 336 (78.5) | <0.001  |
|                                             | Yes                         | 25 (43.9)  | 92 (21.5)  |         |
| MPAS T1                                     | Mean (SD)                   | 81.2 (7.2) | 85.9 (5.1) | <0.001  |
| MPAS T2                                     | Mean (SD)                   | 82.8 (6.0) | 86.1 (5.2) | <0.001  |
| MPAS T3                                     | Mean (SD)                   | 83.7 (5.8) | 86.5 (5.1) | <0.001  |
| Psychiatric diagnosis in previous pregnancy | None, no previous pregnancy | 30 (52.6)  | 226 (52.8) | <0.001  |
|                                             | Yes                         | 7 (12.3)   | 6 (1.4)    |         |
|                                             | None, previous pregnancy    | 20 (35.1)  | 196 (45.8) |         |
| Relocation to the other ward                | None                        | 29 (50.9)  | 327 (76.4) | <0.001  |
|                                             | Yes                         | 28 (49.1)  | 101 (23.6) |         |
| Baby blues                                  | None                        | 17 (29.8)  | 277 (64.7) | <0.001  |
|                                             | Yes                         | 40 (70.2)  | 151 (35.3) |         |
|                                             | None                        | 40 (70.2)  | 390 (91.1) | <0.001  |

|                                                  |      |           |            |        |
|--------------------------------------------------|------|-----------|------------|--------|
| Birth related psychological and physical traumas | Yes  | 17 (29.8) | 38 (8.9)   |        |
| Previous depression                              | None | 40 (70.2) | 400 (93.5) | <0.001 |
|                                                  | Yes  | 17 (29.8) | 28 (6.5)   |        |
| Target                                           | HC   | 17 (29.8) | 416 (97.2) | <0.001 |
|                                                  | PPD  | 2 (3.5)   | 3 (0.7)    |        |
|                                                  | AD   | 38 (66.7) | 9 (2.1)    |        |

Abbreviations: HC, healthy controls; PPD, postpartum depression; AD, adjustment disorder; SD, standard deviation PMS, premenstrual syndrome; EPDS, Edinburgh Postnatal Depression Scale; MPAS, Maternal Postnatal Attachment Scale; SLE, stressful life events.

**Table S9.** Significant differences between clusters 2 vs 5.

| Risk Factors                                | Values                      | Clusters   |            | p-Value |
|---------------------------------------------|-----------------------------|------------|------------|---------|
|                                             |                             | 2          | 5          |         |
| Family status                               | None                        | 4 (23.5)   | 6 (1.4)    | <0.001  |
|                                             | Yes                         | 13 (76.5)  | 422 (98.6) |         |
| Income                                      | Less than 20,000/year       | 9 (52.9)   | 43 (10.1)  | <0.001  |
|                                             | 20,000–50,000/year          | 4 (23.5)   | 129 (30.1) |         |
|                                             | More than 50,000/year       | 4 (23.5)   | 256 (59.8) |         |
| MPAS T1                                     | Mean (SD)                   | 80.1 (8.4) | 85.9 (5.1) | <0.001  |
| MPAS T2                                     | Mean (SD)                   | 76.6 (8.8) | 86.1 (5.2) | <0.001  |
| MPAS T3                                     | Mean (SD)                   | 74.7 (9.0) | 86.5 (5.1) | <0.001  |
| MPAS T4                                     | Mean (SD)                   | 77.8 (8.5) | 86.8 (5.0) | <0.001  |
| PMS Severity                                | 0                           | 1 (5.9)    | 229 (53.5) | <0.001  |
|                                             | 1                           | 7 (41.2)   | 153 (35.7) |         |
|                                             | 2                           | 9 (52.9)   | 46 (10.7)  |         |
| Psychiatric diagnosis in previous pregnancy | None, no previous pregnancy | 5 (29.4)   | 226 (52.8) | <0.001  |
|                                             | Yes                         | 8 (47.1)   | 6 (1.4)    |         |
|                                             | None, previous pregnancy    | 4 (23.5)   | 196 (45.8) |         |
| Stressful life events                       | 0                           | 2 (11.8)   | 239 (55.8) | <0.001  |
|                                             | 1                           | 4 (23.5)   | 98 (22.9)  |         |
|                                             | 2                           | 5 (29.4)   | 45 (10.5)  |         |
|                                             | 3                           | 3 (17.6)   | 24 (5.6)   |         |
|                                             | 4                           | 0 (0.0)    | 12 (2.8)   |         |
|                                             | 5                           | 2 (11.8)   | 3 (0.7)    |         |
|                                             | 6                           | 1 (5.9)    | 5 (1.2)    |         |
|                                             | 7                           | 0 (0.0)    | 1 (0.2)    |         |
|                                             | 8                           | 0 (0.0)    | 0 (0.0)    |         |
|                                             | 9                           | 0 (0.0)    | 1 (0.2)    |         |
| Support at home                             | 1                           | 2 (11.8)   | 184 (43.0) | <0.001  |
|                                             | 2                           | 6 (35.3)   | 173 (40.4) |         |
|                                             | 3                           | 2 (11.8)   | 54 (12.6)  |         |
|                                             | 4                           | 3 (17.6)   | 12 (2.8)   |         |
|                                             | 5                           | 3 (17.6)   | 4 (0.9)    |         |
|                                             | 6                           | 1 (5.9)    | 1 (0.2)    |         |
| Baby blues                                  | None                        | 3 (17.6)   | 277 (64.7) | <0.001  |
|                                             | Yes                         | 14 (82.4)  | 151 (35.3) |         |
| Previous depression                         | None                        | 10 (58.8)  | 400 (93.5) | <0.001  |
|                                             | Yes                         | 7 (41.2)   | 28 (6.5)   |         |
| Target                                      | HC                          | 0 (0.0)    | 416 (97.2) | <0.001  |
|                                             | PPD                         | 17 (100.0) | 3 (0.7)    |         |
|                                             | AD                          | 0 (0.0)    | 9 (2.1)    |         |

Abbreviations: HC, healthy controls; PPD, postpartum depression; AD, adjustment disorder; SD, standard deviation PMS, premenstrual syndrome; EPDS, Edinburgh Postnatal Depression Scale; MPAS, Maternal Postnatal Attachment Scale; SLE, stressful life events.

**Table S10.** Significant differences between clusters 3 vs 5.

| Risk Factors        | Values | Clusters  |            | p-Value |
|---------------------|--------|-----------|------------|---------|
|                     |        | 3         | 5          |         |
| Previous depression | None   | 21 (67.7) | 400 (93.5) | <0.001  |
|                     | Yes    | 10 (32.3) | 28 (6.5)   |         |
| Target              | HC     | 9 (29.0)  | 416 (97.2) | <0.001  |
|                     | PPD    | 1 (3.2)   | 3 (0.7)    |         |
|                     | AD     | 21 (67.7) | 9 (2.1)    |         |

Abbreviations: HC, healthy controls; PPD, postpartum depression; AD, adjustment disorder; SD, standard deviation PMS, premenstrual syndrome; EPDS, Edinburgh Postnatal Depression Scale; MPAS, Maternal Postnatal Attachment Scale; SLE, stressful life events.

**Table S11.** Significant differences between clusters 4 vs 5.

| Risk Factors          | Values    | Clusters   |            | p-Value |
|-----------------------|-----------|------------|------------|---------|
|                       |           | 4          | 5          |         |
| MPAS T1               | Mean (SD) | 81.4 (7.0) | 85.9 (5.1) | <0.001  |
| MPAS T2               | Mean (SD) | 80.1 (8.0) | 86.1 (5.2) | <0.001  |
| MPAS T3               | Mean (SD) | 81.6 (6.7) | 86.5 (5.1) | <0.001  |
| MPAS T4               | Mean (SD) | 81.3 (6.3) | 86.8 (5.0) | <0.001  |
| PMS Severity          | None      | 11 (24.4)  | 229 (53.5) | <0.001  |
|                       | Moderate  | 15 (33.3)  | 153 (35.7) |         |
|                       | Severe    | 19 (42.2)  | 46 (10.7)  |         |
| Stressful life events | 0         | 20 (44.4)  | 239 (55.8) | <0.001  |
|                       | 1         | 5 (11.1)   | 98 (22.9)  |         |
|                       | 2         | 8 (17.8)   | 45 (10.5)  |         |
|                       | 3         | 7 (15.6)   | 24 (5.6)   |         |
|                       | 4         | 1 (2.2)    | 12 (2.8)   |         |
|                       | 5         | 2 (4.4)    | 3 (0.7)    |         |
|                       | 6         | 0 (0.0)    | 5 (1.2)    |         |
|                       | 7         | 1 (2.2)    | 1 (0.2)    |         |
|                       | 8         | 1 (2.2)    | 0 (0.0)    |         |
| Support at home       | 9         | 0 (0.0)    | 1 (0.2)    | <0.001  |
|                       | 1         | 8 (17.8)   | 182 (43.0) |         |
|                       | 2         | 19 (42.2)  | 173 (40.4) |         |
|                       | 3         | 8 (17.8)   | 54 (12.6)  |         |
|                       | 4         | 6 (13.3)   | 12 (2.8)   |         |
|                       | 5         | 3 (6.7)    | 4 (0.9)    |         |
| Baby blues            | 6         | 1 (2.2)    | 1 (0.2)    | <0.001  |
|                       | None      | 12 (26.7)  | 277 (64.7) |         |
| Previous depression   | Yes       | 33 (73.3)  | 151 (35.3) | <0.001  |
|                       | None      | 28 (62.2)  | 400 (93.5) |         |
| Target                | Yes       | 17 (37.8)  | 28 (6.5)   | <0.001  |
|                       | HC        | 7 (15.6)   | 416 (97.2) |         |
|                       | PPD       | 29 (64.4)  | 3 (0.7)    |         |
|                       | AD        | 9 (20.0)   | 9 (2.1)    |         |

Abbreviations: HC, healthy controls; PPD, postpartum depression; AD, adjustment disorder; SD, standard deviation PMS, premenstrual syndrome; EPDS, Edinburgh Postnatal Depression Scale; MPAS, Maternal Postnatal Attachment Scale; SLE, stressful life events.



**Table S12.** Significant differences between clusters 6 vs 5.

| Risk Factors                                     | Values    | Clusters   |            | p-Value |
|--------------------------------------------------|-----------|------------|------------|---------|
|                                                  |           | 5          | 6          |         |
| MPAS T1                                          | Mean (SD) | 85.9 (5.1) | 81.2 (7.5) | <0.001  |
| PMS Severity                                     | None      | 229 (53.5) | 5 (25.0)   | <0.001  |
|                                                  | Moderate  | 153 (35.7) | 7 (35.0)   |         |
|                                                  | Severe    | 46 (10.7)  | 8 (40.0)   |         |
| Baby blues                                       | None      | 277 (64.7) | 3 (15.0)   | <0.001  |
|                                                  | Yes       | 151 (35.3) | 17 (85.0)  |         |
| Birth related psychological and physical traumas | None      | 390 (91.1) | 12 (60.0)  | <0.001  |
|                                                  | Yes       | 38 (8.9)   | 8 (40.0)   |         |
| Target                                           | HC        | 416 (97.2) | 4 (20.0)   | <0.001  |
|                                                  | PPD       | 3 (0.7)    | 3 (15.0)   |         |
|                                                  | AD        | 9 (2.1)    | 13 (65.0)  |         |

Abbreviations: HC, healthy controls; PPD, postpartum depression; AD, adjustment disorder; SD, standard deviation PMS, premenstrual syndrome; EPDS, Edinburgh Postnatal Depression Scale; MPAS, Maternal Postnatal Attachment Scale; SLE, stressful life events.

**Table S13.** Significant differences between clusters 1 vs 3 vs 6.

| Risk Factors | Values    | Clusters   |            |            | p-Value |
|--------------|-----------|------------|------------|------------|---------|
|              |           | 1          | 3          | 6          |         |
| EPDS T0      | Mean (SD) | 10.5 (2.2) | 14.4 (3.7) | 3.3 (2.2)  | <0.001  |
| EPDS T2      | Mean (SD) | 8.1 (2.5)  | 5.1 (4.4)  | 11.6 (2.6) | <0.001  |
| EPDS T3      | Mean (SD) | 6.3 (2.7)  | 3.7 (3.1)  | 8.6 (3.0)  | <0.001  |

Abbreviations: SD, standard deviation; EPDS, Edinburgh Postnatal Depression Scale.

**Table S14.** Significant differences between clusters 2 vs 4 and comparison between PPD in clusters 2 vs 4.

| Risk Factors                                | Values                      | Clusters        |            | p-Value |
|---------------------------------------------|-----------------------------|-----------------|------------|---------|
|                                             |                             | 2               | 4          |         |
| EPDS T0                                     | Mean (SD)                   | 10.8 (3.1)      | 7.0 (2.8)  | <0.001  |
| EPDS T1                                     | Mean (SD)                   | 16.4 (6.3)      | 9.5 (3.4)  | <0.001  |
| EPDS T2                                     | Mean (SD)                   | 16.8 (3.2)      | 10.2 (2.7) | <0.001  |
| EPDS T3                                     | Mean (SD)                   | 17.5 (2.9)      | 10.4 (2.8) | <0.001  |
| EPDS T4                                     | Mean (SD)                   | 17.6 (2.7)      | 10.3 (2.6) | <0.001  |
| Income                                      | Less than 20,000/year       | 9 (53.0)        | 4 (8.9)    | <0.001  |
|                                             | 20,000–50,000/year          | 4 (23.5)        | 15 (33.3)  |         |
|                                             | More than 50,000/year       | 4 (23.5)        | 26 (57.8)  |         |
| Psychiatric diagnosis in previous pregnancy | None, no previous pregnancy | 5 (29.4)        | 26 (57.8)  | <0.001  |
|                                             | Yes                         | 8 (47.1)        | 1 (2.2)    |         |
|                                             | None, previous pregnancy    | 4 (23.5)        | 18 (40.0)  |         |
| Target                                      | HC                          | 0 (0.0)         | 7 (15.6)   | 0.017   |
|                                             | PPD                         | 17 (100.0)      | 29 (64.4)  |         |
|                                             | AD                          | 0 (0.0)         | 9 (20.0)   |         |
|                                             |                             | PPD in Clusters |            |         |
|                                             |                             | 2               | 4          |         |
| EPDS_T0                                     | Mean (SD)                   | 10.8 (3.1)      | 7.4 (3.0)  | 0.001   |
| EPDS_T1                                     | Mean (SD)                   | 16.4 (6.3)      | 9.9 (3.3)  | <0.001  |
| EPDS_T2                                     | Mean (SD)                   | 16.8 (3.2)      | 11.2 (2.2) | <0.001  |
| EPDS_T3                                     | Mean (SD)                   | 17.5 (2.9)      | 10.4 (2.9) | <0.001  |
| EPDS_T4                                     | Mean (SD)                   | 17.6 (2.7)      | 11.3 (2.2) | <0.001  |
| Psychiatric diagnosis in previous pregnancy | None, no previous pregnancy | 5 (29.4)        | 16 (55.2)  | 0.002   |
|                                             | Yes                         | 8 (47.1)        | 1 (3.4)    |         |
|                                             | None, previous pregnancy    | 4 (23.5)        | 12 (41.4)  |         |

Abbreviations: HC, healthy controls; PPD, postpartum depression; AD, adjustment disorder; SD, standard deviation PMS, premenstrual syndrome; EPDS, Edinburgh Postnatal Depression Scale; MPAS, Maternal Postnatal Attachment Scale; SLE, stressful life events.

### Results multLCMM MPAS + EPDS: Model Selection

The best two models for multlcmm MPAS with lowest values of SABIC and AIC and high entropy were considered and are provided in Table S15. Both 5 and 6 class models were unstable under varying starting conditions. Again, the Lo–Mendell–Rubin likelihood (LMR LRT) tests were performed.

**Table S15.** Total association between prenatal features in MPAS-EPDS clusters.

| Model Name                | Nr Classes | AIC   | BIC   | SABIC | Entropy | LMR LRT                                                               | %class1 | %class2 | %class3 | %class4 | %class5 | %class6 |
|---------------------------|------------|-------|-------|-------|---------|-----------------------------------------------------------------------|---------|---------|---------|---------|---------|---------|
| multQFQMLR4_tf            | 4          | 26401 | 26511 | 26432 | 0.72    | Vs<br>mQFQMLR3tf_nr $p$<br>< 0.001 vs<br>mQFQMLR5tf_nr $p$<br>= 0.027 | 30.9    | 46.5    | 11.4    | 11.2    | --      | --      |
|                           |            |       |       |       |         |                                                                       |         |         |         |         |         |         |
|                           |            |       |       |       |         |                                                                       |         |         |         |         |         |         |
| multQFQMLR4_tf_gridsearch | 4          | 26401 | 26511 | 26432 | 0.72    |                                                                       | 46.5    | 30.9    | 11.4    | 11.2    | --      | --      |
| multQFQM6_tf              | 6          | 26431 | 26576 | 26471 | 0.74    | Vs mQFQM5tf_nr<br>$p$ < 0.001 vs<br>mQFQM7tf_nr $p$ =<br>1.000        | 30.1    | 48.3    | 6.0     | 5.1     | 6.3     | 4.2     |
|                           |            |       |       |       |         |                                                                       |         |         |         |         |         |         |
|                           |            |       |       |       |         |                                                                       |         |         |         |         |         |         |
| multQFQM6_tf_gridsearch   | 6          | 26414 | 26559 | 26454 | 0.76    |                                                                       | 46.7    | 7.7     | 4.0     | 1.0     | 29.6    | 11.0    |

Abbreviations: AIC, the Akaike information criterion; BIC, Bayesian information criterion; SABIC, the sample-adjusted Bayesian information criterion; LMR LRT, the Lo–Mendell–Rubin likelihood test. --, not normal distribution.

**Table S16.** Significant differences between all MPAS/EPDS clusters.

| Risk Factors                                | Values                     | Clusters   |            |            |            | p-Value |
|---------------------------------------------|----------------------------|------------|------------|------------|------------|---------|
|                                             |                            | 1          | 2          | 3          | 4          |         |
| EPDS T0                                     | Mean (SD)                  | 5.7 (3.6)  | 3.1 (2.8)  | 8.7 (4.5)  | 7.8 (4.6)  | <0.001  |
| EPDS T1                                     | Mean (SD)                  | 6.3 (2.3)  | 2.1 (1.7)  | 13.1 (4.4) | 9.1 (4.2)  | <0.001  |
| EPDS T2                                     | Mean (SD)                  | 4.8 (2.3)  | 1.3 (1.3)  | 7.9 (4.7)  | 11.8 (4.0) | <0.001  |
| EPDS T3                                     | Mean (SD)                  | 4.2 (2.3)  | 0.9 (1.1)  | 6.4 (4.7)  | 11.6 (4.0) | <0.001  |
| EPDS T4                                     | Mean (SD)                  | 3.5 (2.1)  | 0.8 (1.0)  | 8.4 (5.0)  | 9.1 (4.8)  | <0.001  |
| Familial psychiatric history                | None                       | 206 (74.1) | 152 (82.2) | 39 (57.4)  | 41 (61.2)  | <0.001  |
|                                             | Yes                        | 72 (25.9)  | 33 (17.8)  | 29 (42.6)  | 26 (38.8)  |         |
| MPAS T1                                     | Mean (SD)                  | 84.3 (5.2) | 88.2 (3.9) | 79.7 (8.1) | 82.1 (6.6) | <0.001  |
| MPAS T2                                     | Mean (SD)                  | 84.6 (5.3) | 88.4 (3.9) | 82.5 (6.5) | 79.3 (8.1) | <0.001  |
| MPAS T3                                     | Mean (SD)                  | 85.2 (4.9) | 88.9 (3.8) | 83.3 (5.7) | 79.4 (8.6) | <0.001  |
| MPAS T4                                     | Mean (SD)                  | 85.7 (4.8) | 89.0 (3.7) | 83.1 (6.6) | 81.1 (7.2) | <0.001  |
| PMS Severity                                | None                       | 116 (41.7) | 128 (69.2) | 13 (19.1)  | 19 (28.4)  | <0.001  |
|                                             | Moderate                   | 119 (42.8) | 49 (26.5)  | 33 (48.5)  | 20 (29.9)  |         |
|                                             | Severe                     | 43 (15.5)  | 8 (4.3)    | 22 (32.4)  | 28 (41.8)  |         |
| Psychiatric diagnosis in previous pregnancy | None, noprevious pregnancy | 157 (56.5) | 93 (50.3)  | 43 (63.2)  | 28 (41.8)  | <0.001  |
|                                             | Yes                        | 9 (3.2)    | 2 (1.1)    | 5 (7.4)    | 9 (13.4)   |         |
|                                             | None, previous pregnancy   | 112 (40.3) | 90 (48.6)  | 20 (29.4)  | 30 (44.8)  |         |
| Support at home                             | 1                          | 106 (38.1) | 97 (52.5)  | 23 (33.8)  | 13 (19.4)  | <0.001  |
|                                             | 2                          | 117 (42.1) | 64 (34.6)  | 16 (23.5)  | 26 (38.8)  |         |
|                                             | 3                          | 43 (15.5)  | 18 (9.7)   | 15 (22.1)  | 14 (20.9)  |         |
|                                             | 4                          | 9 (3.2)    | 4 (2.2)    | 9 (13.2)   | 8 (11.9)   |         |
|                                             | 5                          | 3 (1.1)    | 1 (0.5)    | 4 (5.9)    | 5 (7.5)    |         |
|                                             | 6                          | 0 (0.0)    | 1 (0.5)    | 1 (1.5)    | 1 (1.5)    |         |

|                                                  |      |            |            |           |           |        |
|--------------------------------------------------|------|------------|------------|-----------|-----------|--------|
| Baby blues                                       | None | 149 (53.6) | 145 (78.4) | 9 (13.2)  | 20 (29.9) | <0.001 |
|                                                  | Yes  | 129 (46.4) | 40 (21.6)  | 59 (86.8) | 47 (70.1) |        |
| Birth related psychological and physical traumas | None | 241 (86.7) | 175 (94.6) | 49 (72.1) | 52 (77.6) | <0.001 |
|                                                  | Yes  | 37 (13.3)  | 10 (5.4)   | 19 (27.9) | 15 (22.4) |        |
| Previous depression                              | None | 243 (87.4) | 176 (95.1) | 50 (73.5) | 46 (68.7) | <0.001 |
|                                                  | Yes  | 35 (12.6)  | 9 (4.9)    | 18 (26.5) | 21 (31.3) |        |
| Target                                           | HC   | 248 (89.2) | 183 (98.9) | 8 (11.8)  | 14 (20.9) | <0.001 |
|                                                  | PPD  | 0 (0.0)    | 0 (0.0)    | 21 (30.9) | 34 (50.7) |        |
|                                                  | AD   | 30 (10.8)  | 2 (1.1)    | 39 (57.4) | 19 (28.4) |        |

Abbreviations: HC, healthy controls; PPD, postpartum depression; AD, adjustment disorder; SD, standard deviation PMS, premenstrual syndrome; EPDS, Edinburgh Postnatal Depression Scale; MPAS, Maternal Postnatal Attachment Scale; SLE, stressful life events.

**Table S17.** Significant differences between clusters 1 vs 2.

| Risk Factors | Values    | Clusters   |            | p-Value |
|--------------|-----------|------------|------------|---------|
|              |           | 1          | 2          |         |
| EPDS T0      | Mean (SD) | 5.7 (3.6)  | 3.1 (2.8)  | <0.001  |
| EPDS T1      | Mean (SD) | 6.3 (2.3)  | 2.1 (1.7)  | <0.001  |
| EPDS T2      | Mean (SD) | 4.8 (2.3)  | 1.3 (1.3)  | <0.001  |
| EPDS T3      | Mean (SD) | 4.2 (2.3)  | 0.9 (1.1)  | <0.001  |
| EPDS T4      | Mean (SD) | 3.5 (2.1)  | 0.8 (1.0)  | <0.001  |
| MPAS T1      | Mean (SD) | 84.3 (5.2) | 88.2 (3.9) | <0.001  |
| MPAS T2      | Mean (SD) | 84.6 (5.3) | 88.4 (3.9) | <0.001  |
| MPAS T3      | Mean (SD) | 85.2 (4.9) | 88.9 (3.8) | <0.001  |
| MPAS T4      | Mean (SD) | 85.7 (4.8) | 89.0 (3.7) | <0.001  |
| PMS Severity | None      | 116 (41.7) | 128 (69.2) | <0.001  |
|              | Moderate  | 119 (42.8) | 49 (26.5)  |         |
|              | Severe    | 43 (15.5)  | 8 (4.3)    |         |
| Baby blues   | No        | 149 (53.6) | 145 (78.4) | <0.001  |
|              | Yes       | 129 (46.4) | 40 (21.6)  |         |
| Target       | HC        | 248 (89.2) | 183 (98.9) | <0.001  |
|              | PPD       | 0 (0.0)    | 0 (0.0)    |         |
|              | AD        | 30 (10.8)  | 2 (1.1)    |         |

Abbreviations: HC, healthy controls; PPD, postpartum depression; AD, adjustment disorder; SD, standard deviation PMS, premenstrual syndrome; EPDS, Edinburgh Postnatal Depression Scale; MPAS, Maternal Postnatal Attachment Scale; SLE, stressful life events.

**Table S18.** Significant differences between clusters 2 vs 3.

| Risk Factors                 | Values    | Clusters   |            | p-Value |
|------------------------------|-----------|------------|------------|---------|
|                              |           | 2          | 3          |         |
| EPDS T0                      | Mean (SD) | 3.1 (2.8)  | 8.7 (4.5)  | <0.001  |
| EPDS T1                      | Mean (SD) | 2.1 (1.7)  | 13.1 (4.4) | <0.001  |
| EPDS T2                      | Mean (SD) | 1.3 (1.3)  | 7.9 (4.7)  | <0.001  |
| EPDS T3                      | Mean (SD) | 0.9 (1.1)  | 6.4 (4.7)  | <0.001  |
| EPDS T4                      | Mean (SD) | 0.8 (1.0)  | 8.4 (5.0)  | <0.001  |
| Familial psychiatric history | None      | 152 (82.2) | 39 (57.4)  | <0.001  |
|                              | Yes       | 33 (17.8)  | 29 (42.6)  |         |
| MPAS T1                      | Mean (SD) | 88.2 (3.9) | 79.7 (8.1) | <0.001  |
| MPAS T2                      | Mean (SD) | 88.4 (3.9) | 82.5 (6.5) | <0.001  |
| MPAS T3                      | Mean (SD) | 88.9 (3.8) | 83.3 (5.7) | <0.001  |
| MPAS T4                      | Mean (SD) | 89.0 (3.7) | 83.1 (6.6) | <0.001  |
| PMS Severity                 | 0         | 128 (69.2) | 13 (19.1)  | <0.001  |
|                              | 1         | 49 (26.5)  | 33 (48.5)  |         |
|                              | 2         | 8 (4.3)    | 22 (32.4)  |         |
| Support at home              | 1         | 97 (52.5)  | 23 (33.8)  | <0.001  |

|                                                  |      |            |           |        |
|--------------------------------------------------|------|------------|-----------|--------|
|                                                  | 2    | 64 (34.6)  | 16 (23.5) |        |
|                                                  | 3    | 18 (9.7)   | 15 (22.1) |        |
|                                                  | 4    | 4 (2.2)    | 9 (13.2)  |        |
|                                                  | 5    | 1 (0.5)    | 4 (5.9)   |        |
|                                                  | 6    | 1 (0.5)    | 1 (1.5)   |        |
| Baby blues                                       | None | 145 (78.4) | 9 (13.2)  | <0.001 |
|                                                  | Yes  | 40 (21.6)  | 59 (86.8) |        |
| Birth related psychological and physical traumas | None | 175 (94.6) | 49 (72.1) | <0.001 |
|                                                  | Yes  | 10 (5.4)   | 19 (27.9) |        |
| Previous depression                              | None | 176 (95.1) | 50 (73.5) | <0.001 |
|                                                  | Yes  | 9 (4.9)    | 18 (26.5) |        |
| Target                                           | HC   | 183 (98.9) | 8 (11.8)  | <0.001 |
|                                                  | PPD  | 0 (0.0)    | 21 (30.9) |        |
|                                                  | AD   | 2 (1.1)    | 39 (57.4) |        |

Abbreviations: HC, healthy controls; PPD, postpartum depression; AD, adjustment disorder; SD, standard deviation PMS, premenstrual syndrome; EPDS, Edinburgh Postnatal Depression Scale; MPAS, Maternal Postnatal Attachment Scale; SLE, stressful life events.

**Table S19.** Significant differences between clusters 2 vs 4.

| Risk Factors                                | Values                      | Clusters   |            | p-Value |
|---------------------------------------------|-----------------------------|------------|------------|---------|
|                                             |                             | 2          | 4          |         |
| EPDS T0                                     | Mean (SD)                   | 3.1 (2.8)  | 7.8 (4.6)  | <0.001  |
| EPDS T1                                     | Mean (SD)                   | 2.1 (1.7)  | 9.1 (4.2)  | <0.001  |
| EPDS T2                                     | Mean (SD)                   | 1.3 (1.3)  | 11.8 (4.0) | <0.001  |
| EPDS T3                                     | Mean (SD)                   | 0.9 (1.1)  | 11.6 (4.0) | <0.001  |
| EPDS T4                                     | Mean (SD)                   | 0.8 (1.0)  | 9.1 (4.8)  | <0.001  |
| MPAS T1                                     | Mean (SD)                   | 88.2 (3.9) | 82.1 (6.6) | <0.001  |
| MPAS T2                                     | Mean (SD)                   | 88.4 (3.9) | 79.3 (8.1) | <0.001  |
| MPAS T3                                     | Mean (SD)                   | 88.9 (3.8) | 79.4 (8.6) | <0.001  |
| MPAS T4                                     | Mean (SD)                   | 89.0 (3.7) | 81.1 (7.2) | <0.001  |
| PMS Severity                                | None                        | 128 (69.2) | 19 (28.4)  | <0.001  |
|                                             | Moderate                    | 49 (26.5)  | 20 (29.9)  |         |
|                                             | Severe                      | 8 (4.3)    | 28 (41.8)  |         |
| Psychiatric diagnosis in previous pregnancy | None, no previous pregnancy | 93 (50.3)  | 28 (41.8)  | <0.001  |
|                                             | Yes                         | 2 (1.1)    | 9 (13.4)   |         |
|                                             | None, previous pregnancy    | 90 (48.6)  | 30 (44.8)  |         |
| Stressful life events                       | 0                           | 111 (60.0) | 29 (43.3)  | <0.001  |
|                                             | 1                           | 44 (23.8)  | 7 (10.4)   |         |
|                                             | 2                           | 16 (8.6)   | 14 (20.9)  |         |
|                                             | 3                           | 8 (4.3)    | 8 (11.9)   |         |
|                                             | 4                           | 5 (2.7)    | 3 (4.5)    |         |
|                                             | 5                           | 0 (0.0)    | 4 (6.0)    |         |
|                                             | 6                           | 1 (0.5)    | 1 (1.5)    |         |
|                                             | 7                           | 0 (0.0)    | 1 (1.5)    |         |
|                                             | 8                           | 0 (0.0)    | 0 (0.0)    |         |
|                                             | 9                           | 0 (0.0)    | 0 (0.0)    |         |
| Support at home                             | 1                           | 97 (52.5)  | 13 (19.4)  | <0.001  |
|                                             | 2                           | 64 (34.6)  | 26 (38.8)  |         |
|                                             | 3                           | 18 (9.7)   | 14 (20.9)  |         |
|                                             | 4                           | 4 (2.2)    | 8 (11.9)   |         |
|                                             | 5                           | 1 (0.5)    | 5 (7.5)    |         |
|                                             | 6                           | 1 (0.5)    | 1 (1.5)    |         |
| Baby blues                                  | None                        | 145 (78.4) | 20 (29.9)  | <0.001  |
|                                             | Yes                         | 40 (21.6)  | 47 (70.1)  |         |

|                                                  |      |            |           |        |
|--------------------------------------------------|------|------------|-----------|--------|
| Birth related psychological and physical traumas | None | 175 (94.6) | 52 (77.6) | <0.001 |
|                                                  | Yes  | 10 (5.4)   | 15 (22.4) |        |
| Previous depression                              | None | 176 (95.1) | 46 (68.7) | <0.001 |
|                                                  | Yes  | 9 (4.9)    | 21 (31.3) |        |
| Target                                           | HC   | 183 (98.9) | 14 (20.9) | <0.001 |
|                                                  | PPD  | 0 (0.0)    | 34 (50.7) |        |
|                                                  | AD   | 2 (1.1)    | 19 (28.4) |        |

Abbreviations: HC, healthy controls; PPD, postpartum depression; AD, adjustment disorder; SD, standard deviation PMS, premenstrual syndrome; EPDS, Edinburgh Postnatal Depression Scale; MPAS, Maternal Postnatal Attachment Scale; SLE, stressful life events.

**Table S20.** Significant differences between clusters 3 vs 4.

| Risk Factors | Values    | Clusters   |            | <i>p</i> -Value |
|--------------|-----------|------------|------------|-----------------|
|              |           | 3          | 4          |                 |
| EPDS_T1      | Mean (SD) | 13.1 (4.4) | 9.1 (4.2)  | <0.001          |
| EPDS_T2      | Mean (SD) | 7.9 (4.7)  | 11.8 (4.0) | <0.001          |
| EPDS_T3      | Mean (SD) | 6.4 (4.7)  | 11.6 (4.0) | <0.001          |

Abbreviations: SD, standard deviation; EPDS, Edinburgh Postnatal Depression Scale.

**Table S21.** Significant differences between HCs in cluster 1 and baseline (cluster 2).

| Risk Factors | Values    | Clusters   |            | <i>p</i> -Value |
|--------------|-----------|------------|------------|-----------------|
|              |           | 1          | 2          |                 |
| EPDS_T0      | Mean (SD) | 5.1 (3.1)  | 2.9 (2.6)  | <0.001          |
| EPDS_T1      | Mean (SD) | 6.0 (2.1)  | 2.1 (1.7)  | <0.001          |
| EPDS_T2      | Mean (SD) | 4.5 (2.1)  | 1.3 (1.3)  | <0.001          |
| EPDS_T3      | Mean (SD) | 4.1 (2.3)  | 0.9 (1.1)  | <0.001          |
| EPDS_T4      | Mean (SD) | 3.4 (2.1)  | 0.8 (1.0)  | <0.001          |
| MPAS_T1      | Mean (SD) | 84.5 (5.3) | 88.2 (3.9) | <0.001          |
| MPAS_T2      | Mean (SD) | 84.7 (5.3) | 88.3 (3.9) | <0.001          |
| MPAS_T3      | Mean (SD) | 85.1 (4.9) | 88.9 (3.9) | <0.001          |
| MPAS_T4      | Mean (SD) | 85.7 (4.8) | 89.0 (3.8) | <0.001          |
| PMS Severity | None      | 104 (41.9) | 128 (69.9) | <0.001          |
|              | Moderate  | 106 (42.7) | 47 (25.7)  |                 |
|              | Severe    | 38 (15.3)  | 8 (4.4)    |                 |
| Baby blues   | None      | 137 (55.2) | 144 (78.7) | <0.001          |
|              | Yes       | 111 (44.8) | 39 (21.3)  |                 |

Abbreviations: HC, healthy controls; PPD, postpartum depression; AD, adjustment disorder; SD, standard deviation PMS, premenstrual syndrome; EPDS, Edinburgh Postnatal Depression Scale; MPAS, Maternal Postnatal Attachment Scale; SLE, stressful life events.
